# Supplementary material
Source: PubMed Central journal article supplement (PMC8248994)
Supplement: ehab098_supplementary_appendix.pdf [file ehab098_supplementary_appendix.pdf]

## Online supplementary Appendix: The RATE-AF team

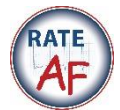

| Name                                              | Role/Position                                                   | Institution (current)                                                                                                                    |
|---------------------------------------------------|-----------------------------------------------------------------|------------------------------------------------------------------------------------------------------------------------------------------|
| <b>Patient Public Involvement representatives</b> |                                                                 |                                                                                                                                          |
| Sandra Haynes                                     | Patient and Public Involvement team                             | n/a                                                                                                                                      |
| Jacqueline C Jones                                | Patient and Public Involvement team                             |                                                                                                                                          |
| Mary Stanbury                                     | Patient and Public Involvement Lead                             |                                                                                                                                          |
| <b>Trial Management Team and Investigators</b>    |                                                                 |                                                                                                                                          |
| Dr Karina V Bunting                               | PhD Fellow & Research Assistant;<br>Senior Cardiac Physiologist | Institute of Cardiovascular Sciences, University of Birmingham (UoB) & University Hospitals Birmingham, NHS Foundation Trust (UHBFT), UK |
| Prof Melanie J Calvert                            | Professor of Outcomes Methodology                               | Institute of Applied Health Research, UoB, UK                                                                                            |
| Prof Jonathan J Deeks                             | Professor of Biostatistics                                      | Birmingham Clinical Trials Unit, UoB, UK                                                                                                 |
| Patience Domingos                                 | Research Nurse                                                  | Sandwell & West Birmingham Hospitals NHS Trust & UHBFT, UK                                                                               |
| Dr Simrat K Gill                                  | PhD Fellow; Specialist Cardiology Registrar                     | Institute of Cardiovascular Sciences, UoB & UHBFT, UK                                                                                    |
| Dr Margaret Grant                                 | Trial Manager                                                   | Birmingham Clinical Trials Unit, UoB, UK                                                                                                 |
| Dr Michael Griffith                               | Principal Investigator; Consultant Electrophysiologist          | UHBFT, UK                                                                                                                                |
| Emma Hayes                                        | Trial Manager                                                   | Birmingham Clinical Trials Unit, UoB, UK                                                                                                 |
| Dr Susan Jowett                                   | Senior Lecturer in Health Economics                             | Institute of Applied Health Research, UoB, UK                                                                                            |
| Prof Paulus Kirchhof                              | Professor of Cardiovascular Medicine                            | Institute of Cardiovascular Science, UoB & UHBFT, UK & Hamburg Center for Cardiovascular research                                        |
| Prof Dipak Kotecha                                | Chief Investigator; Professor of Cardiology & Cardiac Imaging   | Institute of Cardiovascular Sciences, UoB & UHBFT, UK                                                                                    |
| Prof Gregory YH Lip                               | Principal Investigator; Professor of Cardiovascular Medicine    | University of Liverpool and Liverpool Heart and Chest Hospital NHS Foundation Trust, Liverpool, UK                                       |
| Dr Jonathan Mathers                               | Senior lecturer in Qualitative and Mixed Methods Research       | Institute of Applied Health Research, UoB, UK                                                                                            |
| Samir Mehta                                       | Trial Statistician                                              | Birmingham Clinical Trials Unit, UoB, UK                                                                                                 |
| Sukhi Sehmi                                       | Trial Manager                                                   | Birmingham Clinical Trials Unit, UoB, UK                                                                                                 |
| Dr Gemma Slinn                                    | Trials Unit Team Leader                                         | Birmingham Clinical Trials Unit, UoB, UK                                                                                                 |
| Dr Richard P Steeds                               | Consultant Cardiologist and Head of Cardiac Imaging             | UHBFT & Institute of Cardiovascular Sciences, UoB, UK                                                                                    |
| Dr Victoria Stoll                                 | Specialist cardiology registrar and Clinical Lecturer           | Institute of Cardiovascular Sciences, UoB & UHBFT, UK                                                                                    |
| Prof Jonathan N Townend                           | Principal Investigator; Professor of Cardiology                 | UHBFT & Institute of Cardiovascular Sciences, UoB, UK                                                                                    |
| Dr Rebekah Wale                                   | Trial Manager                                                   | Birmingham Clinical Trials Unit, UoB, UK                                                                                                 |
| Hannah Watson                                     | Trial Manager                                                   | Birmingham Clinical Trials Unit, UoB, UK                                                                                                 |
| <b>Trial Oversight Committees</b>                 |                                                                 |                                                                                                                                          |
| Prof A John Camm                                  | Independent Chair of the Trial Steering Committee               | St George's University of London, London, UK                                                                                             |
| Prof Kazem Rahimi                                 | Independent Chair of the Data Monitoring Committee              | University of Oxford, Oxford UK                                                                                                          |
| Dr Victoria Y Strauss                             | Independent Statistician                                        | University of Oxford, Oxford, UK                                                                                                         |
